# Supplementary material for: Suicidality among sexual minority and transgender adolescents: a nationally representative population-based study of youth in Canada
Source: PubMed Central journal article supplement — CMAJ. 2022 Jun 6;194(22):E767–74. doi: 10.1503/cmaj.212054 (PMC9177208; doi:10.1503/cmaj.212054), 2022-06-06
Supplement: 212054-res-1-at.pdf [file 212054-res-1-at.pdf]

**Table S1.** Multivariable modified Poisson regression models for sexual minority status and suicide outcomes: sensitivity analysis.

|                          | Suicidal ideation<br>n=6,800; n <sub>events</sub> = 980 |        |      | Suicide attempt<br>n=6,795; n <sub>events</sub> = 480 |        |      |
|--------------------------|---------------------------------------------------------|--------|------|-------------------------------------------------------|--------|------|
|                          | RR                                                      | 95% CI |      | RR                                                    | 95% CI |      |
| Sexual minority status   |                                                         |        |      |                                                       |        |      |
| Heterosexual (referent)  | -                                                       | -      | -    | -                                                     | -      | -    |
| Boys attracted to boys   | 1.87                                                    | 0.80   | 4.38 | 3.39                                                  | 0.50   | 22.1 |
| Girls attracted to girls | <b>3.07</b>                                             | 2.20   | 4.29 | <b>2.86</b>                                           | 1.57   | 5.20 |
| Attracted to >1 gender   | <b>2.72</b>                                             | 2.17   | 3.42 | <b>3.72</b>                                           | 2.68   | 5.15 |
| Transgender              | <b>4.21</b>                                             | 3.10   | 5.73 | <b>6.54</b>                                           | 4.14   | 10.3 |
| Not sure                 | 1.19                                                    | 0.83   | 1.70 | <b>1.78</b>                                           | 1.09   | 2.91 |

*Note.* Analyses adjusted for low income, rural residence, visible minority status, sex at birth, and age.

**Table S2.** Multivariable modified Poisson regression models for the relationships between sexual attraction and suicide outcomes, stratified by sex assigned at birth.

|                                              | Suicidal Ideation |        |        |             |        |      | Suicide Attempt |        |         |             |      |         |        |
|----------------------------------------------|-------------------|--------|--------|-------------|--------|------|-----------------|--------|---------|-------------|------|---------|--------|
|                                              | RR                | Males  |        | Females     |        | RR   | Males           |        | Females |             | RR   | Females |        |
|                                              |                   | 95% CI | 95% CI | RR          | 95% CI |      | 95% CI          | 95% CI | RR      | 95% CI      |      | RR      | 95% CI |
| <b>Sexual attraction</b>                     |                   |        |        |             |        |      |                 |        |         |             |      |         |        |
| Only opposite gender (referent)              | -                 |        |        | -           |        |      | -               |        |         | -           |      |         |        |
| Both genders equally /mostly opposite gender | <b>2.81</b>       | 2.09   | 3.79   | <b>2.41</b> | 1.96   | 2.97 | <b>3.64</b>     | 2.24   | 5.90    | <b>2.63</b> | 1.94 | 3.56    |        |
| Mostly or only same gender                   | 2.09              | 0.88   | 4.97   | <b>3.61</b> | 2.55   | 5.10 | 3.82            | 0.56   | 26.1    | <b>3.28</b> | 1.81 | 5.94    |        |
| Not sure                                     | 1.22              | 0.60   | 2.45   | 1.45        | 0.93   | 2.27 | 2.26            | 0.83   | 6.17    | <b>2.00</b> | 1.09 | 3.67    |        |

*Note.* To ensure minimum cell sizes were met (per Statistics Canada guidelines), transgender participants were excluded from this analysis. Attraction\*sex interaction was not significant (p > .05). Models adjusted for income, rural residence, visible minority status, and age.

**Table S3.** Multivariable Poisson regression models for sexual minority status and suicide outcomes, unadjusted for sex assigned at birth

|                          | Suicidal ideation<br>n=6,800; n <sub>events</sub> = 980 |        |      | Suicide attempt<br>(n=6,795; n <sub>events</sub> = 480) |        |      |
|--------------------------|---------------------------------------------------------|--------|------|---------------------------------------------------------|--------|------|
|                          | RR                                                      | 95% CI |      | RR                                                      | 95% CI |      |
| Sexual minority status   |                                                         |        |      |                                                         |        |      |
| Heterosexual (referent)  | -                                                       | -      | -    | -                                                       | -      | -    |
| Boys attracted to boys   | 1.69                                                    | 0.73   | 3.93 | 2.88                                                    | 0.42   | 19.5 |
| Girls attracted to girls | <b>4.48</b>                                             | 3.23   | 6.21 | <b>4.29</b>                                             | 2.37   | 7.76 |
| Attracted to >1 gender   | <b>2.75</b>                                             | 2.33   | 3.24 | <b>3.16</b>                                             | 2.46   | 4.08 |
| Transgender              | <b>5.59</b>                                             | 4.07   | 7.67 | <b>8.82</b>                                             | 5.43   | 14.3 |
| Not sure                 | 1.43                                                    | 0.99   | 2.05 | <b>2.13</b>                                             | 1.28   | 3.52 |
| Low family income        | 0.85                                                    | 0.67   | 1.08 | 1.00                                                    | 0.69   | 1.44 |
| Rural residence          | 0.85                                                    | 0.70   | 1.04 | 1.10                                                    | 0.82   | 1.47 |
| Visible minority member  | 1.08                                                    | 0.92   | 1.28 | 1.14                                                    | 0.88   | 1.46 |
| Age                      |                                                         |        |      |                                                         |        |      |
| 15 years (referent)      | -                                                       | -      | -    | -                                                       | -      | -    |
| 16 years                 | 1.09                                                    | 0.90   | 1.31 | <b>1.32</b>                                             | 1.00   | 1.74 |
| 17 years                 | 0.99                                                    | 0.82   | 1.20 | <b>1.40</b>                                             | 1.05   | 1.86 |

Figure S1. Sample mediation model

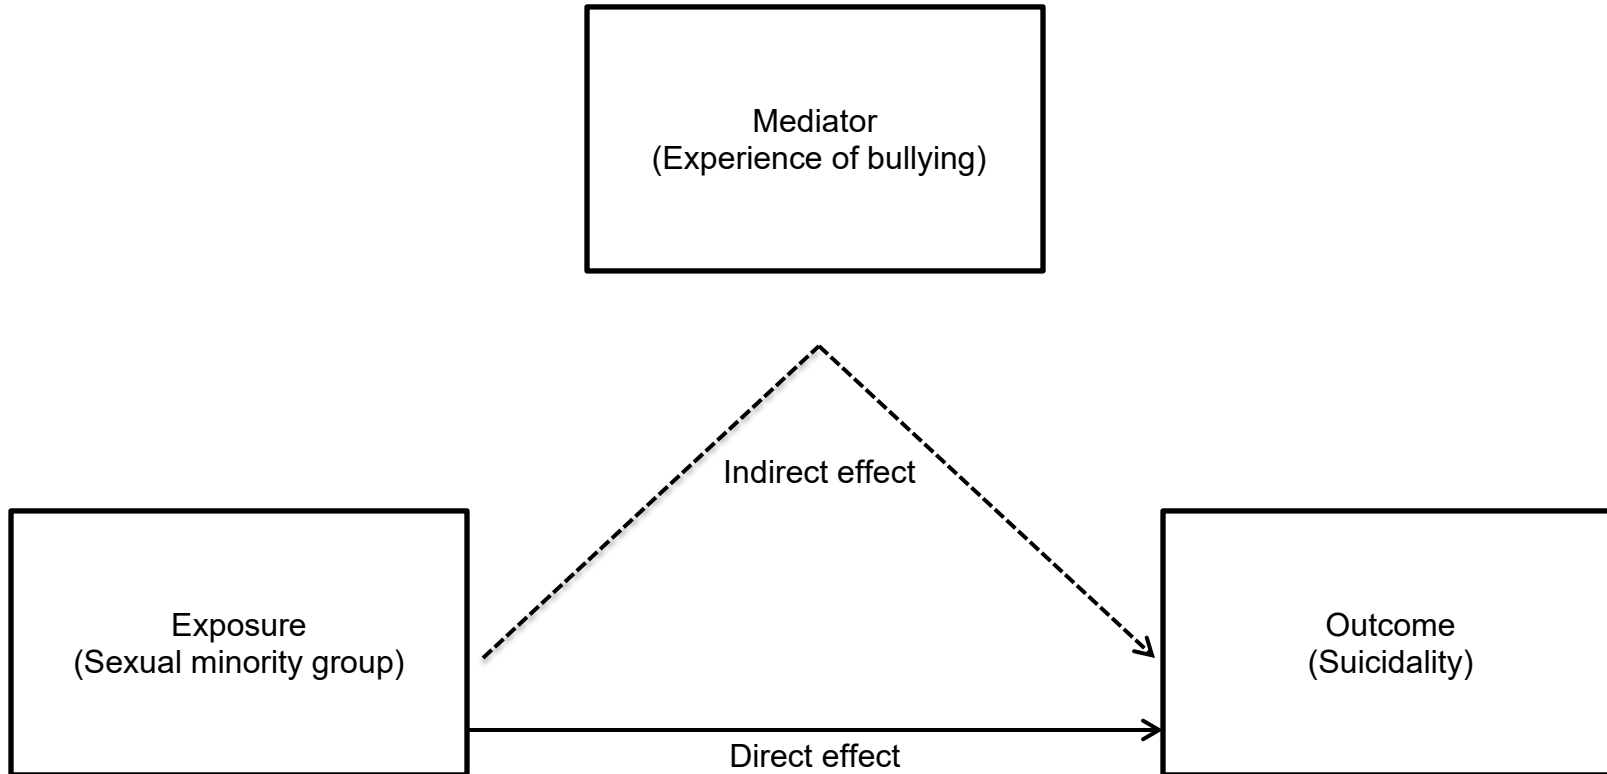

## Resources

|                                                                     |                                                                                                                                                                                                                   |
|---------------------------------------------------------------------|-------------------------------------------------------------------------------------------------------------------------------------------------------------------------------------------------------------------|
| Trans Suicide Prevention and Mental Health Promotion Toolkit        | <a href="https://www.wisdom2action.org/trans-suicide-prevention-and-mental-health-promotion-toolkit/">https://www.wisdom2action.org/trans-suicide-prevention-and-mental-health-promotion-toolkit/</a>             |
| Raising the Bar for 2SLGBTQ+ Youth                                  | <a href="https://www.wisdom2action.org/raisingthebar/">https://www.wisdom2action.org/raisingthebar/</a>                                                                                                           |
| Doing Better for 2SLGBTQ+ Communities in Health and Social Services | <a href="https://www.wisdom2action.org/doing-better-for-2slgbtq-communities-in-health-and-social-services/">https://www.wisdom2action.org/doing-better-for-2slgbtq-communities-in-health-and-social-services/</a> |
| Trauma Informed Youth Engagement                                    | <a href="https://www.wisdom2action.org/trauma-informed-youth-engagement/">https://www.wisdom2action.org/trauma-informed-youth-engagement/</a>                                                                     |
| More resources can be found at                                      | <a href="https://www.wisdom2action.org/resources">Wisdom2action.org/resources</a>                                                                                                                                 |
